# Supplementary material for: Phytoplankton response to increased nickel in the context of ocean alkalinity enhancement
Source: Copernicus journal article supplement (doi:10.5194/bg-21-761-2024), 2024-02-12
Supplement: Supplementary file 1 [file bg-21-761-2024-supplement.pdf]

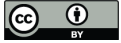

*Supplement of*

## **Phytoplankton response to increased nickel in the context of ocean alkalinity enhancement**

**Xiaoke Xin et al.**

*Correspondence to:* Xiaoke Xin (xxin@geomar.de)

The copyright of individual parts of the supplement might differ from the article licence.

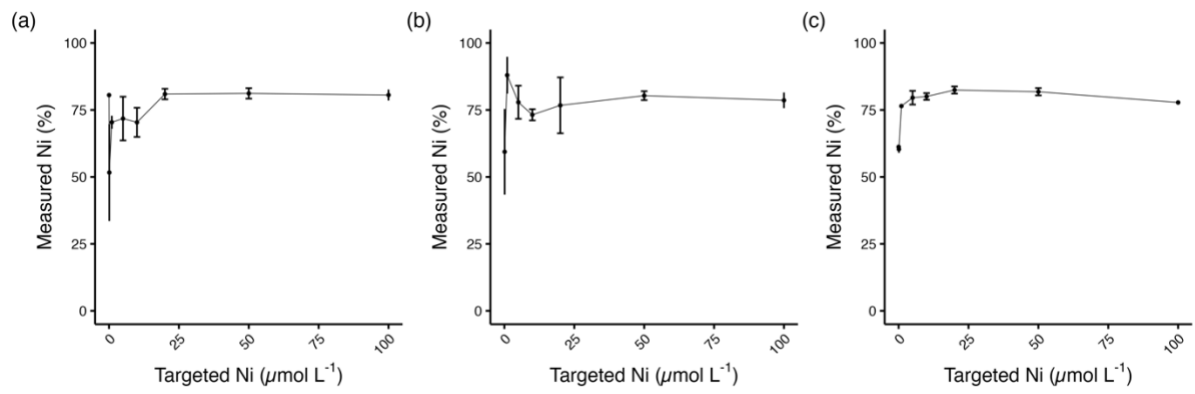

Figure S1. Percentage of measured Ni in (a) *A. carterae*, (b) *E. huxleyi* and (c) *T. weissflogii* cultures on the final experimental day. Error bars denote standard deviations (N = 3).

Table S1. Counts and growth rates of *A. carterae*, *E. huxleyi* and *T. weissflogii* cultures on the final experimental day. SD denotes standard deviation (N = 3).

| Species               | Ni concentration<br>( $\mu\text{mol L}^{-1}$ ) | Count<br>(Cells $\text{mL}^{-1}$ ) | Count SD | Growth rate<br>( $\text{d}^{-1}$ ) | Growth rate SD |
|-----------------------|------------------------------------------------|------------------------------------|----------|------------------------------------|----------------|
| <i>A. carterae</i>    | 0                                              | 10290                              | 212.84   | 0.47                               | 0.02           |
|                       | 0.01                                           | 10523.33                           | 687.19   | 0.45                               | 0.01           |
|                       | 0.05                                           | 11060                              | 259.81   | 0.48                               | 0.05           |
|                       | 0.7                                            | 11070                              | 160      | 0.44                               | 0.02           |
|                       | 3.59                                           | 10923.33                           | 57.74    | 0.51                               | 0.02           |
|                       | 7.04                                           | 7731.67                            | 433.77   | 0.45                               | 0.02           |
|                       | 16.19                                          | 3486.67                            | 205.99   | 0.32                               | 0.01           |
|                       | 40.59                                          | 3243.33                            | 49.33    | 0.32                               | 0.02           |
|                       | 80.57                                          | 4163.33                            | 338.58   | 0.35                               | 0.02           |
| <i>E. huxleyi</i>     | 0                                              | 111703.33                          | 20559.34 | 0.87                               | 0.02           |
|                       | 0.06                                           | 128513.33                          | 17199.66 | 0.92                               | 0.03           |
|                       | 0.88                                           | 179850                             | 23947.04 | 0.97                               | 0.04           |
|                       | 3.89                                           | 140136.67                          | 5834.49  | 0.95                               | 0.01           |
|                       | 7.32                                           | 84250                              | 7259.86  | 0.84                               | 0.01           |
|                       | 15.34                                          | 45570                              | 6117.85  | 0.76                               | 0.06           |
|                       | 40.17                                          | 34026.67                           | 3601.46  | 0.71                               | 0.06           |
|                       | 78.6                                           | 29346.67                           | 2060.98  | 0.67                               | 0              |
| <i>T. weissflogii</i> | 0                                              | 14743.33                           | 313.42   | 0.82                               | 0.02           |
|                       | 0.01                                           | 13653.33                           | 1253.01  | 0.8                                | 0.05           |
|                       | 0.06                                           | 13741.67                           | 2750.11  | 0.8                                | 0.04           |
|                       | 0.76                                           | 14810                              | 407.06   | 0.78                               | 0.02           |
|                       | 3.98                                           | 11546.67                           | 574.92   | 0.76                               | 0.04           |
|                       | 8                                              | 10686.67                           | 962.41   | 0.74                               | 0.06           |
|                       | 16.49                                          | 9420                               | 790.19   | 0.75                               | 0.03           |
|                       | 40.9                                           | 4053.33                            | 101.16   | 0.58                               | 0.01           |
|                       | 77.79                                          | 676.67                             | 120.97   | 0.3                                | 0.03           |
